# Supplementary material for: Personality and morphological traits affect pigeon survival from raptor attacks
Source: PubMed Central journal article supplement (PMC4614540; doi:10.1038/srep15490), 2015-10-22

Santos, C.D., Cramer, J.F, Pârâu, L.G., Miranda, A.C., Wikelski, M. & Dechmann, D.K.N. Personality and morphological traits affect pigeon survival from raptor attacks.

Supplementary Figure S1. Evidence for pigeon predation by raptors. (a) Tracking data showing a predation event. Pigeons were moving SW as a flock when attacked. Remains of the predated pigeon (white track) and its GPS logger were found at the head of its track (position marked by +). Remaining animals of the flock (red tracks) temporarily dispersed after the predation event. Forest patches and pastures are represented in dark green and light green, respectively. (b) GPS logger with attachment skin patch recovered from a predated pigeon. (c) Injured pigeon that escaped from a raptor attack. The background map in (a) was created with the free GIS software QGIS, using satellite images publically available at the Earth Science Data Interface (ESDI).

Supplementary Table S1. Estimated parameters for Cox proportional hazard models with alternative variables for plumage coloration (plumage lightness and plumage oddity). Coefficient estimates ( $\beta$ ), exponent of coefficients ( $\exp(\beta)$ ), standard errors (SE), Z statistics, 95% confidence intervals (95% CI), and P-value (P) are shown for each model. FID - flight initiation distance; TI - tonic immobility; ERT - escape reaction time; FN - feeder neophobia.

| Covariate                                  | $\beta$      | $\exp(\beta)$ | SE           | Z           | 95% CI               | P            |
|--------------------------------------------|--------------|---------------|--------------|-------------|----------------------|--------------|
| Full model with plumage lightness (Colour) |              |               |              |             |                      |              |
| Tarsus                                     | 1.445        | 4.240         | 0.636        | 2.27        | 1.218, 14.760        | 0.023        |
| Wing                                       | 0.016        | 1.017         | 0.011        | 1.51        | 0.995, 1.038         | 0.130        |
| Weight                                     | 0.001        | 1.001         | 0.019        | 0.05        | 0.964, 1.039         | 0.959        |
| <b>Colour</b>                              | <b>0.529</b> | <b>1.697</b>  | <b>0.259</b> | <b>2.04</b> | <b>1.021, 2.821</b>  | <b>0.041</b> |
| Pectoral                                   | 0.005        | 1.005         | 0.004        | 1.18        | 0.997, 1.012         | 0.240        |
| FID                                        | -0.252       | 0.777         | 0.107        | -2.36       | 0.630, 0.959         | 0.019        |
| TI                                         | -0.310       | 0.733         | 0.116        | -2.68       | 0.585, 0.920         | 0.007        |
| ERT                                        | 0.116        | 1.124         | 0.053        | 2.19        | 1.012, 1.247         | 0.029        |
| FN                                         | 0.123        | 1.131         | 0.067        | 1.84        | 0.992, 1.290         | 0.066        |
| Full model with plumage oddity (Odd)       |              |               |              |             |                      |              |
| Tarsus                                     | 1.308        | 3.700         | 0.604        | 2.17        | 1.134, 12.077        | 0.030        |
| Wing                                       | 0.016        | 1.017         | 0.010        | 1.60        | 0.996, 1.037         | 0.110        |
| Weight                                     | 0.004        | 1.004         | 0.018        | 0.21        | 0.969, 1.039         | 0.838        |
| <b>Odd</b>                                 | <b>1.067</b> | <b>2.907</b>  | <b>0.791</b> | <b>1.35</b> | <b>0.617, 13.699</b> | <b>0.177</b> |
| Pectoral                                   | 0.007        | 1.007         | 0.004        | 1.89        | 1.000, 1.014         | 0.058        |
| FID                                        | -0.192       | 0.825         | 0.085        | -2.25       | 0.698, 0.975         | 0.024        |

|     |        |       |       |       |              |       |
|-----|--------|-------|-------|-------|--------------|-------|
| TI  | -0.236 | 0.790 | 0.093 | -2.53 | 0.658, 0.948 | 0.011 |
| ERT | 0.087  | 1.091 | 0.045 | 1.93  | 0.999, 1.193 | 0.054 |

---

Supplementary Table S2. Field and tracking evidence for pigeon losses due to raptor predation.

| Pigeon id | Flight where lost (M – Males; F – Females) | Field evidence                          |                                |                                                                            |                                                                       | Tracking evidence                                                                  |                                                                                   |                                                     |                                                                         | Losses during non-tracked flights |
|-----------|--------------------------------------------|-----------------------------------------|--------------------------------|----------------------------------------------------------------------------|-----------------------------------------------------------------------|------------------------------------------------------------------------------------|-----------------------------------------------------------------------------------|-----------------------------------------------------|-------------------------------------------------------------------------|-----------------------------------|
|           |                                            |                                         |                                |                                                                            |                                                                       | Losses during continuous tracking (positions every 2 seconds)                      |                                                                                   |                                                     | Losses during discrete tracking (positions every 4 hours)               |                                   |
|           |                                            | Logger found in a peregrine falcon nest | Freshly plucked feathers found | Logger and/or attachment skin patch found without mammalian teeth markings | Feathers, logger and/or skin patch found near a peregrine falcon nest | Bird dropped from higher than 50 meters to ground level near the last GPS position | Logger stopped in flight with high battery charge (i.e. battery or logger damage) | Flock dispersion coinciding with the loss of a bird | Logger stopped with high battery charge (i.e. battery or logger damage) |                                   |
| P1        | 3 M                                        |                                         | X                              |                                                                            |                                                                       | X                                                                                  |                                                                                   | X                                                   |                                                                         |                                   |

|     |     |   |   |   |   |   |   |   |   |   |
|-----|-----|---|---|---|---|---|---|---|---|---|
| P3  | 1 M |   |   |   |   |   |   |   |   | X |
| P4  | 3 M |   |   | X |   | X |   |   |   |   |
| P5  | 5 M |   | X |   | X | X |   | X |   |   |
| P7  | 1 M |   |   |   |   |   |   |   |   | X |
| P8  | 4 M | X | X | X | X |   |   | X |   |   |
| P14 | 5 M |   |   |   |   |   |   |   | X |   |
| P15 | 5 M |   |   | X | X |   |   | X |   |   |
| P16 | 1 M |   |   |   |   |   | X |   |   |   |
| P17 | 5 M |   |   |   |   |   |   |   | X |   |
| P21 | 4 F |   |   |   |   |   |   |   | X |   |
| P22 | 1 F |   |   |   |   |   |   |   |   | X |
| P23 | 1 F |   |   |   |   |   |   |   |   | X |
| P26 | 2 F |   |   | X |   |   |   |   | X |   |
| P27 | 5 F |   | X | X |   | X |   |   |   |   |

Supplementary Table S3. Spearman's correlation matrix for the predictors used in the Cox proportional hazard models.

|          | Tarsus | Wing  | Weight | Colour | Pectoral | FID   | TI    | ERT   | FN    |
|----------|--------|-------|--------|--------|----------|-------|-------|-------|-------|
| Tarsus   | 1      | 0.46  | 0.58   | 0.12   | 0.21     | -0.11 | 0.29  | -0.25 | 0.05  |
| Wing     | 0.46   | 1     | 0.27   | 0.10   | -0.11    | -0.14 | 0.28  | 0.04  | 0.08  |
| Weight   | 0.58   | 0.27  | 1      | 0.25   | 0.46     | -0.30 | 0.60  | 0.11  | 0.44  |
| Colour   | 0.12   | 0.10  | 0.25   | 1      | 0.53     | 0.11  | 0.23  | -0.07 | 0.09  |
| Pectoral | 0.21   | -0.11 | 0.46   | 0.53   | 1        | -0.03 | 0.39  | 0.12  | 0.27  |
| FID      | -0.11  | -0.14 | -0.30  | 0.11   | -0.03    | 1     | -0.55 | -0.25 | -0.02 |
| TI       | 0.29   | 0.28  | 0.60   | 0.23   | 0.39     | -0.55 | 1     | 0.17  | 0.42  |
| ERT      | -0.25  | 0.04  | 0.11   | -0.07  | 0.12     | -0.25 | 0.17  | 1     | 0.22  |
| FN       | 0.05   | 0.08  | 0.44   | 0.09   | 0.27     | -0.02 | 0.42  | 0.22  | 1     |

Supplementary Figure S1.

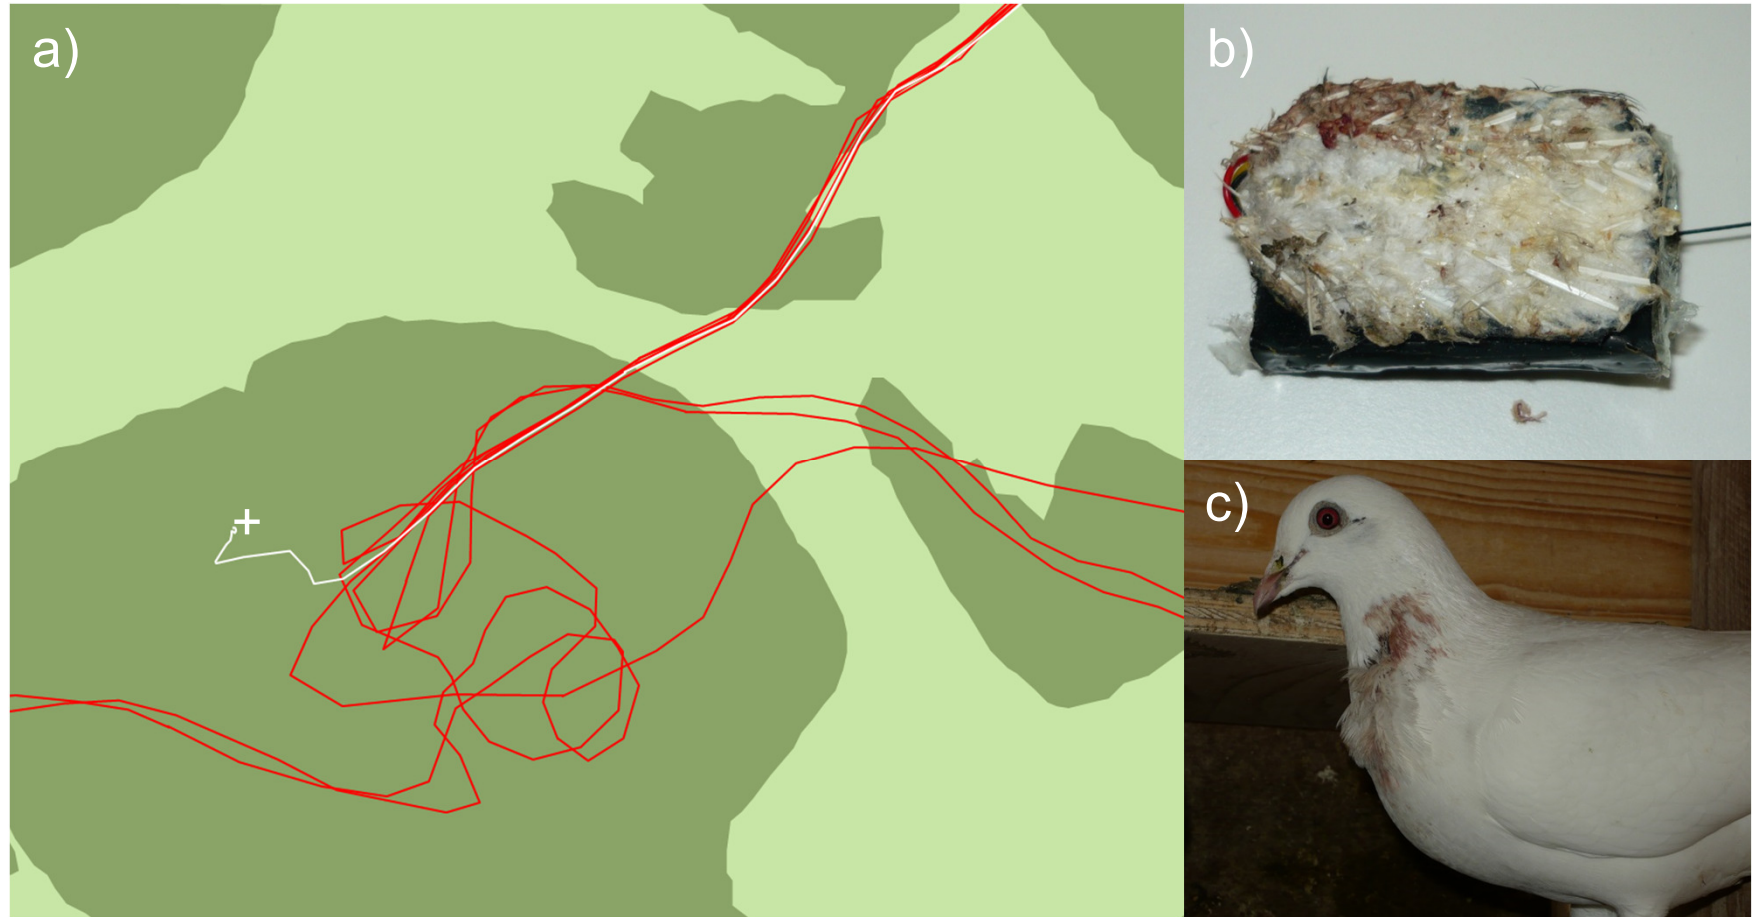

Supplement: srep15490-s1.pdf [file srep15490-s1.pdf]
